# Supplementary material
Source: PubMed Central journal article supplement (PMC4567489)

## Supplementary Online Content

Bandera EV, Lee VS, Rodriguez-Rodriguez L, Powell CB, Kushi LH. Impact of chemotherapy dosing on ovarian cancer survival according to body mass index. *JAMA Oncol*. Published online July 2, 2015. doi:10.1001/jamaoncol.2015.1796

**eTable 1.** Chemotherapy variables

**eTable 2.** Chemotherapy dosing, dose reduction, dose delay, and treatment parameters, by BMI at diagnosis

**eTable 3.** Comorbidities and toxicities before and during treatment by BMI at diagnosis

**eTable 4.** Predictors of dose reduction (RDI<85%)

**eFigure 1.** Kaplan-Meier Curves for Average RDI levels and overall survival and ovarian cancer-specific survival through 72 months of follow-up

This supplementary material has been provided by the authors to give readers additional information about their work.

**eTable 1. Chemotherapy variables**

| <b>Variable</b>                      | <b>Calculation or Definition</b>                                                                                                                                                   |
|--------------------------------------|------------------------------------------------------------------------------------------------------------------------------------------------------------------------------------|
| Actual Dose                          | Dose received                                                                                                                                                                      |
| Expected Dose                        | Based on 2013 NCCN Guidelines:<br>For paclitaxel: 175 mg/m <sup>2</sup> , every 3 weeks for 6 cycles.<br>For carboplatin*: target AUC** x (CrCl + 25), every 3 weeks for 6 cycles) |
| Creatinine Clearance (CrCl)          | Cockcroft-Gault Formula:<br>CrCl = (140 - age in yrs) x (weight in kg) x (0.85 if female) / (72 x serum creatinine)                                                                |
| Actual Duration                      | Days from first cycle to 21 days after the date of last cycle.<br>Divide by 7 to express in weeks.                                                                                 |
| Number of Cycles                     | Number of cycles received                                                                                                                                                          |
| <b>Relative Dose Intensity (RDI)</b> | RDI = Actual Dose Intensity/Expected Dose Intensity.                                                                                                                               |
| Actual Dose Intensity                | Amount of drug administered (actual dose) per week.                                                                                                                                |
| Expected Dose Intensity              | Amount of drug expected to be administered (expected dose) per week based NCCN Guidelines (see expected dose above)                                                                |
| <b>Early discontinuation</b>         | <6 cycles or <4 cycles                                                                                                                                                             |
| <b>Treatment delay</b>               | >7 days delay                                                                                                                                                                      |

\* Calvert equation

\*\*Target AUC as assigned for first cycle in electronic medical records

**eTable 2. Chemotherapy dosing, dose reduction, dose delay, and treatment parameters, by BMI at diagnosis.**

|                                   | Underweight<br>(n=20) | Normal<br>(n=297) | Overweight<br>(n=248) | Obese Class I<br>(n=134) | Obese Class II<br>(n=70) | Obese Class III<br>(n=37) |                  |
|-----------------------------------|-----------------------|-------------------|-----------------------|--------------------------|--------------------------|---------------------------|------------------|
|                                   | Mean (SD)             | Mean (SD)         | Mean (SD)             | Mean (SD)                | Mean (SD)                | Mean (SD)                 | p value*         |
| BSA (calculated)                  | 1.44(0.09)            | 1.61 (0.14)       | 1.75 (0.14)           | 1.89 (0.14)              | 2.08 (0.17)              | 2.22 (0.21)               | <0.001           |
| <b>PACLITAXEL</b>                 |                       |                   |                       |                          |                          |                           |                  |
| RDI first cycle (%)†              | 97.93 (10.55)         | 97.86 (12.17)     | 96.55 (11.78)         | 95.31 (10.67)            | 91.55 (17.27)            | 83.98 (22.39)             | <0.001           |
| RDI all cycles (%)                | 90.41 (14.61)         | 91.16 (11.99)     | 91.00 (11.31)         | 90.44 (11.87)            | 88.56 (14.00)            | 82.43 (14.33)             | <0.01            |
| Actual total dose in mg/kg        | 29.10 (11.83)         | 25.68 (8.04)      | 22.24 (7.56)          | 20.50 (7.11)             | 18.74 (5.99)             | 15.93 (6.03)              | <0.001           |
| Number of cycles                  | 5.45 (2.04)           | 5.38 (1.59)       | 5.17 (1.73)           | 5.18 (1.68)              | 5.30 (1.53)              | 5.16 (1.61)               | 0.70             |
| Treatment duration (weeks)        | 17.99 (7.06)          | 17.49 (5.65)      | 16.53 (5.83)          | 16.42 (5.49)             | 16.96 (5.56)             | 16.38 (6.17)              | 0.30             |
| <b>CARBOPLATIN</b>                |                       |                   |                       |                          |                          |                           |                  |
| RDI first cycle (%)               | 100.00 (11.58)        | 93.01 (13.66)     | 87.99 (13.54)         | 80.64 (13.44)            | 73.17 (15.52)            | 66.28 (16.16)             | <0.001           |
| RDI all cycles (%)                | 91.90 (14.25)         | 85.32 (15.64)     | 82.83 (17.68)         | 77.24 (15.46)            | 68.85 (16.42)            | 65.06 (19.49)             | <0.001           |
| Actual total dose in mg/kg        | 58.70 (30.26)         | 50.43 (19.03)     | 42.02 (17.32)         | 38.54 (15.52)            | 33.21 (13.79)            | 27.72 (13.12)             | <0.001           |
| Number of cycles                  | 5.40 (2.11)           | 5.36 (1.61)       | 5.12 (1.76)           | 5.16 (1.68)              | 5.28 (1.76)              | 5.13 (1.62)               | 0.62             |
| Treatment duration (weeks)        | 17.85 (7.28)          | 17.49 (5.76)      | 16.52 (5.95)          | 16.38 (5.44)             | 16.73 (5.69)             | 16.30 (6.21)              | 0.29             |
| <b>PACLITAXEL+CARBOPLATIN</b>     |                       |                   |                       |                          |                          |                           |                  |
| ARDI first cycle (%)              | 98.97 (6.82)          | 95.44 (9.62)      | 92.27 (9.08)          | 87.98 (0.09)             | 82.36 (13.16)            | 75.13 (15.00)             | <0.001           |
| ARDI all cycles (%)               | 91.16 (12.09)         | 88.24 (12.32)     | 86.92 (12.49)         | 83.84 (12.03)            | 78.71 (12.79)            | 73.74 (12.17)             | <0.001           |
| <i>(All cycles)</i>               | <i>n (%)</i>          | <i>n (%)</i>      | <i>n (%)</i>          | <i>n (%)</i>             | <i>n (%)</i>             | <i>n (%)</i>              | <i>p value**</i> |
| <b>PACLITAXEL</b>                 |                       |                   |                       |                          |                          |                           |                  |
| Dose reduction (RDI<85%)†         | 6 (30.00)             | 77 (25.93)        | 64 (25.81)            | 35 (26.12)               | 20 (28.57)               | 20 (54.05)                | 0.01             |
| Dose delay (>7 days)              | 8 (40.00)             | 103 (34.68)       | 65 (26.21)            | 34 (25.37)               | 17 (24.29)               | 8 (21.62)                 | 0.10             |
| Early discontinuation (<6 cycles) | 7 (35.00)             | 89 (29.97)        | 87 (35.08)            | 42 (31.34)               | 26 (37.14)               | 14 (37.84)                | 0.72             |
| Early discontinuation (<4 cycles) | 3 (15.00)             | 43 (14.48)        | 48 (19.35)            | 24 (17.91)               | 8 (11.43)                | 8 (21.62)                 | 0.47             |
| <b>CARBOPLATIN</b>                |                       |                   |                       |                          |                          |                           |                  |
| Dose reduction (RDI<85%)          | 6 (30.00)             | 139 (46.80)       | 136 (54.84)           | 95 (70.90)               | 59 (84.29)               | 32 (86.49)                | <0.001           |
| Dose delay (>7 days)              | 8 (40.00)             | 105 (35.35)       | 68 (27.42)            | 33 (24.63)               | 16 (22.86)               | 8 (21.62)                 | 0.06             |
| Early discontinuation (<6 cycles) | 7 (35.00)             | 89 (29.97)        | 87 (35.08)            | 41 (30.60)               | 27 (38.57)               | 14 (37.84)                | 0.62             |
| Early discontinuation (<4 cycles) | 3 (15.00)             | 43 (14.48)        | 52 (20.97)            | 24 (17.91)               | 10 (14.29)               | 8 (21.62)                 | 0.41             |
| <b>PACLITAXEL+CARBOPLATIN</b>     |                       |                   |                       |                          |                          |                           |                  |
| Dose reduction (RDI<85%)          | 6 (30.00)             | 92 (30.98)        | 97 (39.11)            | 69 (51.49)               | 46 (65.71)               | 31 (83.78)                | <0.001           |
| Dose delay (>7 days)              | 8 (40.00)             | 105 (35.35)       | 69 (27.82)            | 34 (25.37)               | 18 (25.71)               | 8 (21.62)                 | 0.12             |
| Early discontinuation (<6 cycles) | 7 (35.00)             | 92 (30.98)        | 90 (36.29)            | 42 (31.34)               | 27 (38.57)               | 14 (37.84)                | 0.68             |
| Early discontinuation (<4 cycles) | 3 (15.00)             | 43 (14.48)        | 52 (20.97)            | 24 (17.91)               | 10 (14.29)               | 8 (21.62)                 | 0.41             |

\* Based on ANOVA; \*\* Based on Chi-Square

† RDI: Relative Dose Intensity. ARDI: Average RDI.

**eTable 3. Comorbidities and toxicities before and during treatment by BMI at diagnosis.**

|                                     | Total<br>(n=806)<br>n (%) | Underweight<br>(n=20)<br>n (%) | Normal<br>(n=297)<br>n (%) | Overweight<br>(n=248)<br>n (%) | Obese I<br>(n=134)<br>n (%) | Obese II<br>(n=70)<br>n (%) | Obese III<br>(n=37)<br>n (%) | p value* |
|-------------------------------------|---------------------------|--------------------------------|----------------------------|--------------------------------|-----------------------------|-----------------------------|------------------------------|----------|
| <b>Comorbidities</b>                |                           |                                |                            |                                |                             |                             |                              |          |
| Diabetes mellitus <sup>a</sup>      | 94 (11.66)                | 1 (5.00)                       | 16 (5.39)                  | 28 (11.29)                     | 14 (10.45)                  | 18 (25.71)                  | 17 (49.95)                   | <0.001   |
| Hypertension <sup>a</sup>           | 377 (46.77)               | 7 (35.00)                      | 105 (35.35)                | 116 (46.77)                    | 71 (52.99)                  | 48 (68.57)                  | 30 (81.08)                   | <0.001   |
| Cardiovascular disease <sup>b</sup> | 163 (20.22)               | 4 (20.00)                      | 64 (21.55)                 | 45 (18.15)                     | 28 (20.90)                  | 15 (21.43)                  | 7 (18.92)                    | 0.95     |
| Renal disease <sup>b</sup>          | 106 (13.15)               | 2 (10.00)                      | 25 (8.42)                  | 39 (15.73)                     | 15 (11.19)                  | 13 (18.57)                  | 12 (32.43)                   | <0.001   |
| <b>Toxicities (grade III/IV)</b>    |                           |                                |                            |                                |                             |                             |                              |          |
| <u>Neutropenia</u>                  |                           |                                |                            |                                |                             |                             |                              |          |
| Before chemotherapy <sup>c</sup>    | 12 (1.49)                 | 0 (0)                          | 4 (1.35)                   | 2 (0.81)                       | 4 (2.99)                    | 2 (2.86)                    | 0 (0)                        | 0.46     |
| During chemotherapy <sup>d</sup>    | 237 (29.40)               | 6 (30.00)                      | 109 (36.70)                | 68 (27.42)                     | 33 (24.63)                  | 12 (17.14)                  | 9 (24.32)                    | 0.01     |
| G-CSF use <sup>c</sup>              | 182 (22.58)               | 2 (10.00)                      | 85 (28.62)                 | 52 (20.97)                     | 27 (20.15)                  | 9 (12.86)                   | 7 (18.92)                    | 0.02     |
| <u>Thrombocytopenia</u>             |                           |                                |                            |                                |                             |                             |                              |          |
| Before chemotherapy <sup>c</sup>    | 2 (0.25)                  | 0 (0)                          | 1 (0.34)                   | 0 (0)                          | 1 (0.75)                    | 0 (0)                       | 0 (0)                        | 0.79     |
| During chemotherapy <sup>d</sup>    | 41 (5.09)                 | 1 (5.00)                       | 24 (8.08)                  | 8 (3.23)                       | 4 (2.99)                    | 2 (2.86)                    | 2 (5.41)                     | 0.10     |
| <u>Neuropathy</u>                   |                           |                                |                            |                                |                             |                             |                              |          |
| Before chemotherapy <sup>e</sup>    | 19 (2.36)                 | 1 (5.00)                       | 5 (1.68)                   | 2 (0.81)                       | 6 (4.48)                    | 1 (1.43)                    | 4 (10.81)                    | <0.01    |
| During chemotherapy <sup>d</sup>    | 103 (12.78)               | 1 (5.00)                       | 38 (12.79)                 | 32 (12.90)                     | 16 (11.94)                  | 11 (15.71)                  | 5 (13.51)                    | 0.88     |
| Neuropathy medications <sup>d</sup> | 34 (4.22)                 | 1 (5.00)                       | 17 (5.72)                  | 5 (2.02)                       | 4 (2.99)                    | 5 (7.14)                    | 2 (5.41)                     | 0.24     |

\* p value based on Chi-square test

<sup>a</sup> Having a diagnosis any time before ovarian cancer diagnosis or during chemotherapy; <sup>b</sup> having these conditions diagnosed one year before ovarian cancer diagnosis or during treatment; <sup>c</sup> within one month from first cycle; <sup>d</sup> from first to last cycle; <sup>e</sup> one month before ovarian cancer diagnosis to first cycle

**eTable 4. Predictors of dose reduction (RDI<85%).**

|                                | PACLITAXEL |         |                  | CARBOPLATIN |         |                    | AVERAGE  |         |                    |
|--------------------------------|------------|---------|------------------|-------------|---------|--------------------|----------|---------|--------------------|
|                                | Yes<br>n   | No<br>n | OR (95% CI)      | Yes<br>n    | No<br>n | OR (95% CI)        | Yes<br>n | No<br>n | OR (95% CI)        |
| <b>BMI at diagnosis</b>        |            |         |                  |             |         |                    |          |         |                    |
| Underweight (<18.5)            | 6          | 14      | 1.54 (0.54-4.40) | 6           | 14      | 0.49 (0.18-1.35)   | 6        | 14      | 1.08 (0.38-3.04)   |
| Normal (18.5-24.99)            | 77         | 220     | 1.00             | 139         | 158     | 1.00               | 92       | 205     | 1.00               |
| Overweight (25-29.99)          | 64         | 184     | 1.05 (0.69-1.60) | 136         | 112     | 1.62 (1.12-2.33)   | 97       | 151     | 1.60 (1.09-2.35)   |
| Obese I (30-34.99)             | 35         | 99      | 1.14 (0.68-1.91) | 95          | 39      | 3.45 (2.13-5.58)   | 69       | 65      | 2.85 (1.79-4.55)   |
| Obese II (35-39.99)            | 20         | 50      | 1.22 (0.62-2.38) | 59          | 11      | 8.84 (4.18-18.72)  | 46       | 24      | 5.65 (3.01-10.62)  |
| Obese III (≥40)                | 20         | 17      | 4.03 (1.77-9.17) | 32          | 5       | 13.41 (4.62-38.87) | 31       | 6       | 19.85 (7.21-54.65) |
| <b>Age at diagnosis (yrs)</b>  |            |         |                  |             |         |                    |          |         |                    |
| 21-39                          | 8          | 31      | 1.00             | 26          | 13      | 1.00               | 16       | 23      | 1.00               |
| 40-49                          | 30         | 87      | 0.85 (0.31-2.36) | 74          | 43      | 0.85 (0.34-2.12)   | 57       | 60      | 1.33 (0.55-3.25)   |
| 50-69                          | 138        | 365     | 0.87 (0.34-2.26) | 288         | 215     | 0.65 (0.28-1.53)   | 210      | 293     | 0.97 (0.42-2.24)   |
| ≥70                            | 46         | 101     | 0.88 (0.31-2.50) | 79          | 68      | 0.65 (0.25-1.67)   | 58       | 89      | 0.83 (0.32-2.12)   |
| <b>Race</b>                    |            |         |                  |             |         |                    |          |         |                    |
| White                          | 173        | 478     | 1.00             | 392         | 259     | 1.00               | 278      | 373     | 1.00               |
| African American               | 14         | 28      | 1.11 (0.53-2.31) | 21          | 29      | 0.40 (0.19-0.81)   | 20       | 22      | 0.79 (0.39-1.61)   |
| Asian                          | 29         | 66      | 1.43 (0.84-2.42) | 41          | 54      | 0.67 (0.41-1.09)   | 34       | 61      | 1.10 (0.66-1.81)   |
| Other                          | 6          | 12      | 1.25 (0.41-3.88) | 13          | 5       | 1.49 (0.46-4.79)   | 9        | 9       | 1.20 (0.40-3.60)   |
| <b>Ethnicity</b>               |            |         |                  |             |         |                    |          |         |                    |
| Not Hispanic                   | 197        | 517     | 1.00             | 408         | 306     | 1.00               | 295      | 419     | 1.00               |
| Hispanic                       | 21         | 61      | 1.01 (0.56-1.82) | 53          | 29      | 0.98 (0.57-1.69)   | 41       | 41      | 1.16 (0.68-1.97)   |
| <b>AJCC Stage</b>              |            |         |                  |             |         |                    |          |         |                    |
| I/II                           | 74         | 243     | 1.00             | 169         | 148     | 1.00               | 114      | 203     | 1.00               |
| III                            | 99         | 243     | 1.33 (0.85-2.08) | 209         | 133     | 1.36 (0.92-2.02)   | 156      | 186     | 1.39 (0.93-2.07)   |
| IV                             | 47         | 93      | 1.86 (1.09-3.16) | 86          | 54      | 1.40 (0.86-2.30)   | 69       | 71      | 1.68 (1.02-2.76)   |
| <b>Grade (SEER Definition)</b> |            |         |                  |             |         |                    |          |         |                    |
| Well differentiated            | 12         | 38      | 1.00             | 28          | 22      | 1.00               | 21       | 29      | 1.00               |
| Moderately differentiated      | 33         | 100     | 1.06 (0.45-2.51) | 85          | 48      | 1.76 (0.81-3.80)   | 61       | 72      | 1.33 (0.61-2.89)   |
| Poorly differentiated          | 96         | 222     | 1.07 (0.47-2.44) | 179         | 139     | 1.15 (0.55-2.39)   | 134      | 184     | 0.92 (0.43-1.94)   |
| Undifferentiated               | 31         | 102     | 0.80 (0.33-1.97) | 77          | 56      | 1.40 (0.63-3.10)   | 52       | 81      | 0.88 (0.39-1.99)   |
| Unknown                        | 50         | 122     | 0.99 (0.41-2.39) | 98          | 74      | 1.42 (0.65-3.12)   | 73       | 99      | 1.02 (0.46-2.27)   |

**eTable 4. Predictors of dose reduction (RDI<85%), Continued.**

|                                  | PACLITAXEL |         |                  | CARBOPLATIN |         |                  | AVERAGE  |         |                  |
|----------------------------------|------------|---------|------------------|-------------|---------|------------------|----------|---------|------------------|
|                                  | Yes<br>n   | No<br>n | OR (95% CI)      | Yes<br>n    | No<br>n | OR (95% CI)      | Yes<br>n | No<br>n | OR (95% CI)      |
| <b>Histology</b>                 |            |         |                  |             |         |                  |          |         |                  |
| Serous                           | 125        | 307     | 1.00             | 256         | 176     | 1.00             | 198      | 234     | 1.00             |
| Mucinous                         | 6          | 33      | 0.50 (0.18-1.37) | 24          | 15      | 0.95 (0.41-2.21) | 18       | 21      | 0.97 (0.43-2.19) |
| Endometrioid                     | 25         | 82      | 0.84 (0.46-1.54) | 63          | 44      | 0.99 (0.58-1.70) | 38       | 69      | 0.57 (0.33-0.99) |
| Clear cell                       | 28         | 48      | 1.90 (1.00-3.64) | 37          | 39      | 0.62 (0.34-1.16) | 30       | 46      | 0.83 (0.44-1.57) |
| Other                            | 38         | 114     | 0.93 (0.59-1.48) | 87          | 65      | 1.11 (0.73-1.70) | 57       | 95      | 0.85 (0.55-1.30) |
| <b>Toxicities<sup>a</sup></b>    |            |         |                  |             |         |                  |          |         |                  |
| No                               | 101        | 396     | 1.00             | 260         | 237     | 1.00             | 173      | 324     | 1.00             |
| Yes                              | 121        | 188     | 2.33 (1.65-3.30) | 207         | 102     | 2.34 (1.67-3.28) | 168      | 141     | 2.71 (1.94-3.78) |
| <b>G-CSF use<sup>b</sup></b>     |            |         |                  |             |         |                  |          |         |                  |
| No                               | 151        | 473     | 1.00             | 354         | 270     | 1.00             | 254      | 370     | 1.00             |
| Yes                              | 71         | 111     | 1.78 (1.18-2.67) | 113         | 69      | 1.09 (0.73-1.63) | 87       | 95      | 1.13 (0.76-1.68) |
| <b>Comorbidities<sup>c</sup></b> |            |         |                  |             |         |                  |          |         |                  |
| <u>Diabetes</u>                  |            |         |                  |             |         |                  |          |         |                  |
| No                               | 186        | 526     | 1.00             | 409         | 303     | 1.00             | 291      | 421     | 1.00             |
| Yes                              | 36         | 58      | 1.32 (0.76-2.29) | 58          | 36      | 0.90 (0.51-1.57) | 50       | 44      | 1.05 (0.61-1.81) |
| <u>Hypertension</u>              |            |         |                  |             |         |                  |          |         |                  |
| No                               | 107        | 322     | 1.00             | 250         | 179     | 1.00             | 173      | 256     | 1.00             |
| Yes                              | 115        | 262     | 1.15 (0.78-1.69) | 217         | 160     | 0.83 (0.58-1.17) | 168      | 209     | 0.94 (0.66-1.34) |
| <u>Cardiovascular Disease</u>    |            |         |                  |             |         |                  |          |         |                  |
| No                               | 159        | 484     | 1.00             | 369         | 274     | 1.00             | 261      | 382     | 1.00             |
| Yes                              | 63         | 100     | 1.76 (1.16-2.65) | 98          | 65      | 1.30 (0.86-1.96) | 80       | 83      | 1.55 (1.03-2.33) |
| <u>Renal Disease</u>             |            |         |                  |             |         |                  |          |         |                  |
| No                               | 179        | 521     | 1.00             | 409         | 291     | 1.00             | 288      | 412     | 1.00             |
| Yes                              | 43         | 63      | 1.53 (0.94-2.48) | 58          | 48      | 0.66 (0.41-1.08) | 53       | 53      | 1.05 (0.65-1.70) |

<sup>a</sup> Neutropenia, thrombocytopenia, or neuropathy one month before first cycle or during chemotherapy.

<sup>b</sup> During chemotherapy

<sup>c</sup> One year before or during chemotherapy treatment.

OR and 95% confidence intervals: multivariable model adjusted for all the other variables in the table.

**eFigure 1 Kaplan-Meier Curves for Average RDI levels and overall survival and ovarian cancer-specific survival through 72 months of follow-up.**

**Overall Survival**

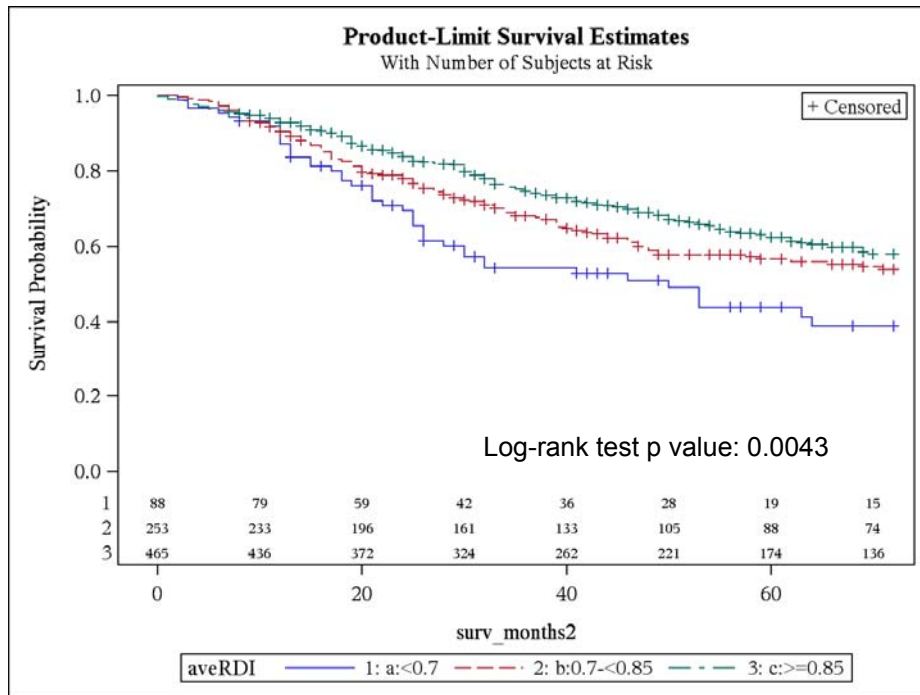

**Ovarian Cancer-Specific Survival**

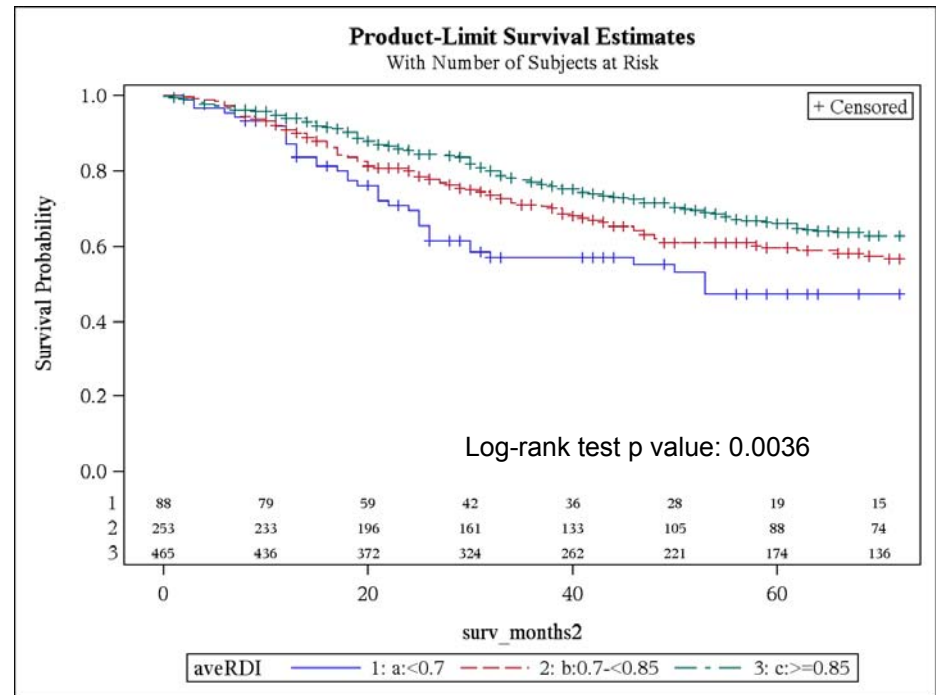

Supplement: NIHMS708145-supplement-tables_and_figure.pdf [file NIHMS708145-supplement-tables_and_figure.pdf]
